# Supplementary material for: Phytochemical Profile and Antioxidant Capacity of Viscum album L. Subsp. album and Effects on Its Host Trees
Source: MDPI journal article supplement (doi:10.3390/plants11223021), 2022-11-09
Supplement: s1 [file s1]

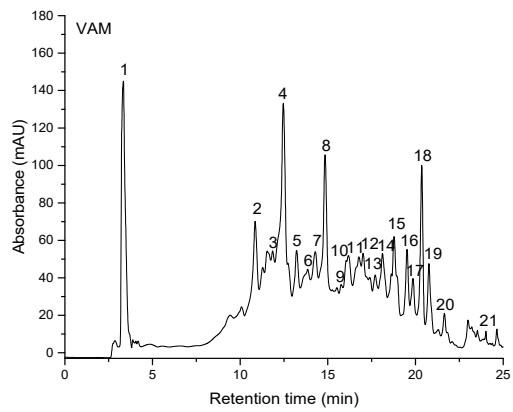

a

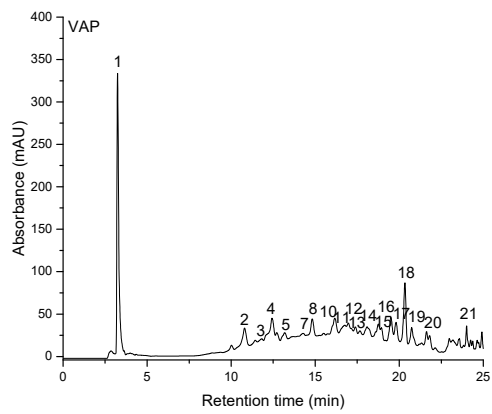

b

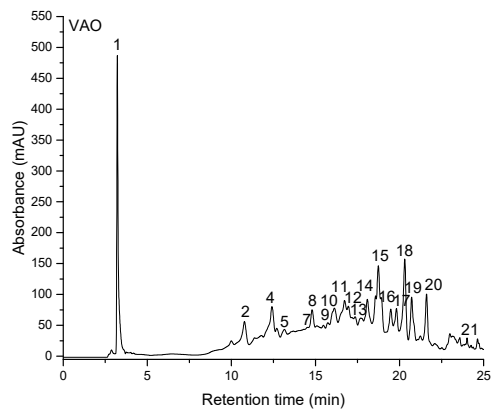

c

**Figure S1.** HPLC chromatograms of mistletoe leaves according to the host trees. a. VAM (mistletoe grown on *Malus domestica* Barkh.), b. VAP (mistletoe grown on *Prunus domestica* L.), c. VAO (mistletoe grown on *Populus alba* L.)
